# Supplementary material
Source: Springer Nature journal article supplement (https://www.springermedizin.de/resource/supplementary/12939_2012_277_MOESM1_ESM.pdf/9550760)

**Pharmaceuticals and medical devices  
(% of income)**

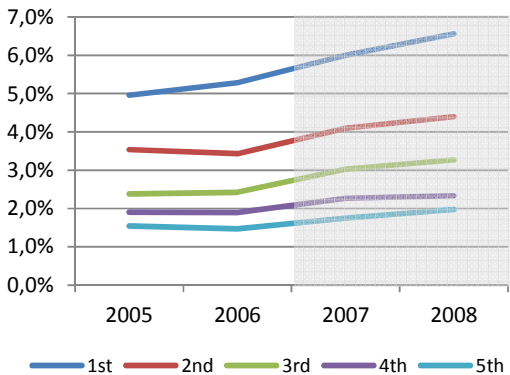

**Pharmaceuticals and medical devices  
(Concentration curve)**

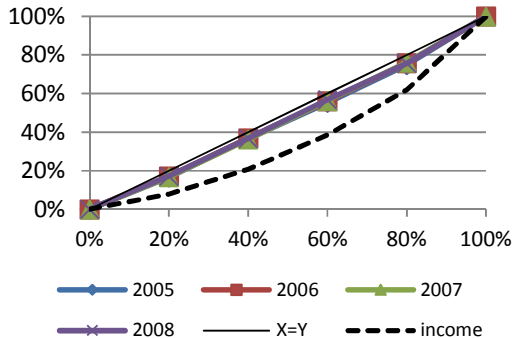

**Formal payments  
(% of income)**

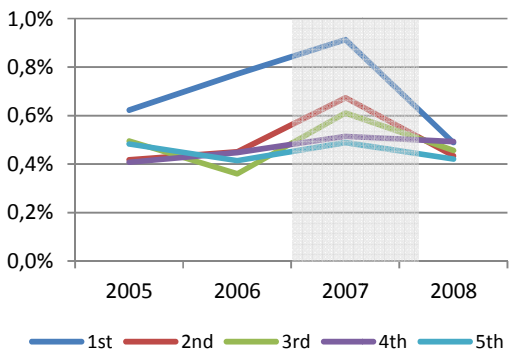

**Formal payments  
(Concentration curve)**

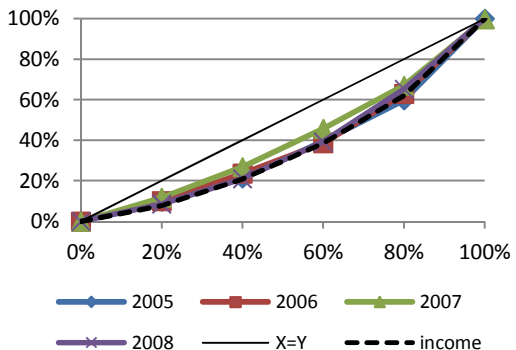

**Informal payments  
(% of income)**

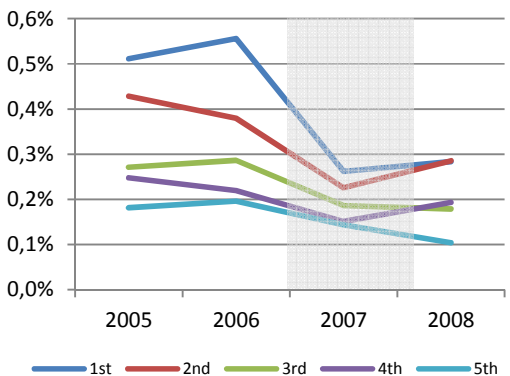

**Informal payments  
(Concentration curve)**

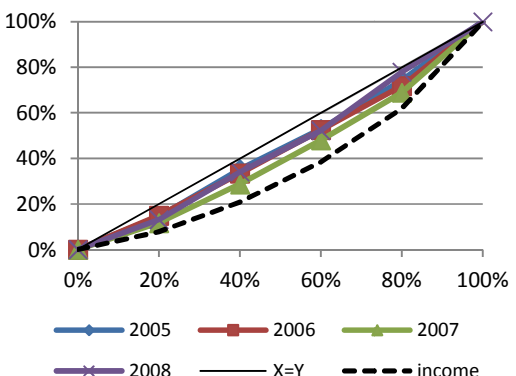

Supplement: MOESM1 [file 9550760]
